# Supplementary material
Source: PubMed Central journal article supplement (PMC4403455)
Supplement: JVI.03685-14_zjv999090298so1.pdf [file JVI.03685-14_zjv999090298so1.pdf]

## Appendix

**Table A1: Detailed results of the SNP analysis**

List of all validated SNPs found in the experiment. SNPs were called using LoFreq algorithm and further filtered: only the SNPs found in both technical replicates were considered reliable and are listed in the table. The p-values reported by LoFreq designate the probability of observed SNP arising as a sequencing error and are modelled using Poisson–binomial distribution, including site specific error rate and sequencing depth into the calculations.

LoFreq detected 116 SNPs in sample VP1 and 120 in sample VP2; 103 SNPs were common for both replicates. 154 SNPs were detected in sample sRNA1 and 198 in sample sRNA2; 121 SNPs were common for both sRNA replicates. 81 SNPs were common for both pools (VP and sRNA).

*Position*: position in PVY genome; *SNP*: observed SNP (consensus nt > variant nt); *gene*: corresponding gene or UTR, *consensus amino acid*; *variant amino acid* and *BLOSUM62*: score for corresponding amino acid change. Minus (-) designates that SNP was not found in the pool. NA: SNP is within UTR region and is thus without amino acid annotations. %: relative frequency in corresponding sample; *coverage*: coverage for the site in corresponding sample; *p-value (LoFreq)*: p-value from the LoFreq analysis.

| position | SNP | gene | consensus amino acid | variant amino acid | BLOSUM 62 | sRNA 1 |          |                  | sRNA 2 |          |                  | VP 1  |          |                  | VP 2  |          |                  |
|----------|-----|------|----------------------|--------------------|-----------|--------|----------|------------------|--------|----------|------------------|-------|----------|------------------|-------|----------|------------------|
|          |     |      |                      |                    |           | %      | coverage | p-value (Lofreq) | %      | coverage | p-value (Lofreq) | %     | coverage | p-value (Lofreq) | %     | coverage | p-value (Lofreq) |
| 22       | A>C | 5UTR | NA                   | NA                 | NA        | 0.42   | 6209     | 3.3E-20          | 0.53   | 6262     | 1.0E-27          | -     | -        | -                | -     | -        | -                |
| 27       | A>T | 5UTR | NA                   | NA                 | NA        | 1.42   | 7459     | 1.1E-121         | 1.47   | 7429     | 7.8E-127         | -     | -        | -                | -     | -        | -                |
| 117      | A>G | 5UTR | NA                   | NA                 | NA        | 0.20   | 15703    | 1.5E-13          | 0.13   | 15342    | 2.0E-08          | 0.33  | 3374     | 6.8E-10          | 0.38  | 3450     | 1.1E-10          |
| 150      | T>G | 5UTR | NA                   | NA                 | NA        | 1.04   | 11845    | 1.4E-100         | 0.91   | 11688    | 9.2E-90          | 1.11  | 1885     | 3.0E-24          | 1.07  | 1954     | 1.9E-23          |
| 321      | A>T | P1   | Q                    | L                  | -2        | 10.90  | 9397     | 0.0E+00          | 10.44  | 8804     | 0.0E+00          | 12.02 | 4660     | 0.0E+00          | 12.05 | 4525     | 0.0E+00          |
| 342      | G>T | P1   | R                    | M                  | -1        | 24.46  | 13370    | 0.0E+00          | 25.44  | 13179    | 0.0E+00          | 7.52  | 8630     | 0.0E+00          | 7.45  | 8378     | 0.0E+00          |
| 403      | T>A | P1   | T                    | T                  | 5         | 0.06   | 41496    | 1.4E-06          | 0.06   | 43300    | 8.2E-07          | -     | -        | -                | -     | -        | -                |
| 406      | T>C | P1   | D                    | D                  | 6         | -      | -        | -                | -      | -        | -                | 0.12  | 17021    | 2.9E-08          | 0.19  | 16034    | 1.7E-17          |
| 481      | A>G | P1   | S                    | S                  | 4         | 0.26   | 10257    | 6.2E-16          | 0.24   | 9818     | 1.8E-13          | 0.17  | 10582    | 2.6E-10          | 0.21  | 9844     | 1.1E-13          |

|      |     |        |   |   |    |       |       |          |       |       |          |       |       |          |       |       |          |
|------|-----|--------|---|---|----|-------|-------|----------|-------|-------|----------|-------|-------|----------|-------|-------|----------|
| 499  | C>T | P1     | I | I | 4  | 0.17  | 18156 | 2.4E-09  | 0.22  | 18552 | 3.3E-19  | 0.21  | 12137 | 7.9E-14  | 0.21  | 11496 | 2.8E-14  |
| 635  | A>G | P1     | I | V | 3  | 0.40  | 6537  | 7.7E-23  | 0.31  | 6492  | 1.1E-16  | -     | -     | -        | -     | -     | -        |
| 652  | A>G | P1     | Q | Q | 5  | 1.38  | 3041  | 5.7E-48  | 1.31  | 2668  | 3.9E-40  | 0.51  | 2144  | 4.8E-10  | 0.56  | 2159  | 6.1E-10  |
| 815  | C>T | P1     | R | C | -3 | 0.14  | 20961 | 2.1E-12  | 0.10  | 21762 | 1.9E-07  | 0.16  | 16337 | 1.6E-11  | 0.15  | 15494 | 1.3E-09  |
| 844  | G>A | P1     | K | K | 5  | 0.42  | 15354 | 7.6E-47  | 0.33  | 15539 | 2.9E-35  | 0.48  | 14490 | 4.4E-52  | 0.45  | 13765 | 4.0E-47  |
| 909  | C>T | P1     | T | I | -1 | -     | -     | -        | -     | -     | -        | 0.44  | 4567  | 2.9E-09  | 0.34  | 4647  | 2.0E-09  |
| 982  | C>T | P1     | I | I | 4  | 0.37  | 8113  | 7.4E-24  | 0.28  | 7773  | 3.7E-18  | -     | -     | -        | -     | -     | -        |
| 1074 | A>G | HC-Pro | N | S | 1  | 0.61  | 3924  | 2.9E-20  | 0.82  | 3653  | 1.1E-28  | 1.06  | 10585 | 7.5E-128 | 0.73  | 9954  | 1.1E-72  |
| 1318 | A>G | HC-Pro | K | K | 5  | 0.89  | 11891 | 5.4E-48  | 0.97  | 11934 | 6.8E-58  | -     | -     | -        | -     | -     | -        |
| 1549 | C>T | HC-Pro | I | I | 4  | 3.64  | 9170  | 0.0E+00  | 2.92  | 9403  | 0.0E+00  | 2.92  | 6081  | 5.0E-239 | 2.74  | 6404  | 4.1E-227 |
| 1795 | A>G | HC-Pro | V | V | 4  | 3.16  | 5493  | 1.2E-217 | 3.02  | 5446  | 4.8E-202 | 2.32  | 7504  | 7.7E-217 | 2.24  | 7662  | 3.1E-197 |
| 1855 | G>A | HC-Pro | G | G | 6  | 1.84  | 2061  | 4.3E-34  | 1.58  | 1706  | 1.1E-19  | 1.16  | 3261  | 4.8E-39  | 1.32  | 2868  | 5.5E-41  |
| 1866 | A>G | HC-Pro | K | R | 2  | 0.41  | 5411  | 2.1E-17  | 0.45  | 5314  | 5.8E-20  | 0.80  | 7889  | 3.8E-58  | 0.75  | 7449  | 3.0E-57  |
| 1885 | T>C | HC-Pro | D | D | 6  | 0.62  | 17591 | 1.1E-81  | 0.62  | 18987 | 8.1E-83  | 1.30  | 20478 | 1.5E-292 | 1.20  | 20122 | 1.6E-256 |
| 1993 | C>T | HC-Pro | G | G | 6  | 11.34 | 6943  | 0.0E+00  | 11.34 | 6530  | 0.0E+00  | 5.21  | 5557  | 0.0E+00  | 5.96  | 5488  | 0.0E+00  |
| 2002 | G>A | HC-Pro | K | K | 5  | 0.54  | 10090 | 1.2E-52  | 0.51  | 9948  | 2.0E-48  | 0.54  | 7267  | 1.4E-36  | 0.47  | 7191  | 9.2E-24  |
| 2025 | A>G | HC-Pro | N | S | 1  | 0.17  | 10512 | 1.4E-08  | 0.23  | 10651 | 2.8E-14  | 0.19  | 14457 | 6.8E-16  | 0.19  | 15059 | 4.9E-18  |
| 2036 | T>C | HC-Pro | L | L | 4  | 0.88  | 6791  | 2.7E-60  | 0.65  | 6717  | 4.8E-39  | 0.65  | 8824  | 2.9E-51  | 0.88  | 9206  | 1.7E-80  |
| 2230 | T>C | HC-Pro | H | H | 8  | 4.33  | 14505 | 0.0E+00  | 4.56  | 14735 | 0.0E+00  | 2.95  | 6565  | 8.6E-261 | 3.32  | 6632  | 1.0E-298 |
| 2254 | A>G | HC-Pro | L | L | 4  | 0.74  | 24185 | 3.6E-152 | 0.78  | 25107 | 1.5E-176 | 1.03  | 23358 | 5.9E-268 | 1.01  | 22952 | 6.0E-240 |
| 2266 | G>A | HC-Pro | E | E | 5  | 32.26 | 20793 | 0.0E+00  | 32.27 | 21714 | 0.0E+00  | 24.08 | 19199 | 0.0E+00  | 24.65 | 18540 | 0.0E+00  |
| 2368 | T>A | HC-Pro | D | E | 2  | 0.53  | 6197  | 1.4E-15  | 0.88  | 6223  | 7.0E-39  | 0.99  | 8307  | 1.8E-77  | 0.80  | 8479  | 7.8E-65  |
| 2480 | T>C | P3     | S | P | -1 | 0.73  | 12798 | 1.8E-71  | 0.66  | 12803 | 1.4E-53  | 1.57  | 21284 | 0.0E+00  | 1.42  | 21304 | 6.4E-302 |
| 2485 | A>G | P3     | A | A | 4  | 0.43  | 16087 | 5.6E-54  | 0.36  | 16003 | 6.7E-41  | 0.96  | 21853 | 1.2E-222 | 0.98  | 21975 | 8.3E-235 |
| 2593 | G>A | P3     | L | L | 4  | 25.87 | 6038  | 0.0E+00  | 25.09 | 5970  | 0.0E+00  | 50.18 | 6056  | 0.0E+00  | 49.53 | 5874  | 0.0E+00  |
| 2666 | A>G | P3     | M | V | 1  | 13.46 | 5732  | 0.0E+00  | 14.44 | 5407  | 0.0E+00  | 29.69 | 1073  | 0.0E+00  | 26.31 | 1041  | 0.0E+00  |
| 2695 | C>T | P3     | A | A | 4  | 15.33 | 9599  | 0.0E+00  | 15.79 | 9668  | 0.0E+00  | 15.87 | 1215  | 0.0E+00  | 16.26 | 1117  | 7.6E-316 |
| 2751 | C>T | P3     | A | V | 0  | 0.19  | 9888  | 4.5E-11  | 0.19  | 9422  | 5.3E-10  | -     | -     | -        | -     | -     | -        |
| 2845 | A>G | P3     | R | R | 5  | 0.97  | 12104 | 1.2E-88  | 1.07  | 12346 | 2.6E-87  | -     | -     | -        | -     | -     | -        |
| 2861 | A>T | P3     | T | S | 1  | 0.22  | 8583  | 6.4E-12  | 0.29  | 8907  | 8.0E-17  | 0.56  | 4092  | 4.9E-24  | 0.61  | 4100  | 1.4E-26  |

|      |     |     |   |   |   |       |       |         |       |       |         |       |       |          |       |       |          |
|------|-----|-----|---|---|---|-------|-------|---------|-------|-------|---------|-------|-------|----------|-------|-------|----------|
| 2899 | C>T | P3  | S | S | 4 | 0.17  | 22282 | 4.6E-14 | 0.19  | 23365 | 4.3E-20 | -     | -     | -        | -     | -     | -        |
| 2903 | G>A | P3  | V | I | 3 | 0.13  | 24259 | 9.1E-14 | 0.11  | 25353 | 8.9E-10 | -     | -     | -        | -     | -     | -        |
| 2915 | G>A | P3  | E | K | 1 | 0.19  | 8006  | 6.3E-07 | 0.21  | 7970  | 9.8E-09 | 0.25  | 11749 | 9.6E-19  | 0.34  | 12160 | 2.6E-25  |
| 2977 | A>T | P3  | L | F | 0 | 1.26  | 1984  | 1.4E-27 | 1.04  | 1728  | 5.5E-12 | 0.90  | 3539  | 1.2E-31  | 1.09  | 3497  | 1.9E-40  |
| 2991 | A>T | P3  | Y | F | 3 | 0.30  | 13907 | 1.5E-24 | 0.32  | 14135 | 1.6E-26 | -     | -     | -        | -     | -     | -        |
| 3109 | C>T | P3  | V | V | 4 | 0.92  | 3253  | 7.9E-32 | 0.89  | 3367  | 1.9E-30 | 1.31  | 3210  | 4.7E-38  | 0.95  | 3146  | 2.2E-28  |
| 3478 | A>G | P3  | E | E | 5 | 0.79  | 6426  | 1.6E-44 | 0.86  | 6286  | 4.1E-52 | 1.69  | 5133  | 6.9E-108 | 1.96  | 5096  | 3.1E-124 |
| 3622 | C>T | 6K1 | V | V | 4 | -     | -     | -       | -     | -     | -       | 0.55  | 2558  | 4.6E-13  | 0.48  | 2273  | 2.8E-08  |
| 3664 | C>T | CI  | D | D | 6 | 5.70  | 25620 | 0.0E+00 | 6.01  | 27601 | 0.0E+00 | 4.69  | 7697  | 0.0E+00  | 4.83  | 7902  | 0.0E+00  |
| 3835 | A>G | CI  | E | E | 5 | -     | -     | -       | -     | -     | -       | 0.14  | 9779  | 1.1E-07  | 0.21  | 9683  | 1.5E-13  |
| 3850 | C>T | CI  | T | T | 5 | 0.35  | 7675  | 2.0E-19 | 0.39  | 7124  | 1.4E-16 | 0.78  | 3602  | 2.2E-25  | 0.75  | 3474  | 2.4E-27  |
| 3895 | C>T | CI  | D | D | 6 | 1.22  | 3372  | 3.7E-51 | 1.41  | 3109  | 2.9E-54 | 0.56  | 4304  | 3.7E-19  | 0.68  | 4395  | 3.9E-31  |
| 3940 | G>A | CI  | L | L | 4 | 48.24 | 6466  | 0.0E+00 | 49.39 | 6382  | 0.0E+00 | 31.90 | 13463 | 0.0E+00  | 32.32 | 12930 | 0.0E+00  |
| 3943 | T>C | CI  | P | P | 7 | 0.25  | 8245  | 3.9E-09 | 0.25  | 8115  | 2.4E-11 | 0.16  | 13986 | 1.2E-09  | 0.16  | 13470 | 6.1E-10  |
| 4036 | C>T | CI  | F | F | 6 | 0.39  | 7257  | 4.4E-19 | 0.37  | 7032  | 8.8E-20 | 0.36  | 2805  | 3.5E-09  | 0.59  | 2720  | 9.2E-13  |
| 4042 | G>A | CI  | K | K | 5 | 0.28  | 6664  | 2.6E-11 | 0.35  | 6370  | 1.9E-16 | 1.03  | 2039  | 1.4E-19  | 0.75  | 1997  | 1.5E-16  |
| 4093 | C>T | CI  | I | I | 4 | 0.50  | 5651  | 6.9E-23 | 0.68  | 5753  | 1.8E-35 | -     | -     | -        | -     | -     | -        |
| 4118 | C>T | CI  | L | L | 4 | -     | -     | -       | -     | -     | -       | 0.18  | 8802  | 2.8E-08  | 0.18  | 8673  | 1.1E-09  |
| 4220 | C>T | CI  | L | L | 4 | 0.75  | 11392 | 5.6E-79 | 0.66  | 11151 | 1.1E-69 | 0.26  | 5391  | 1.0E-10  | 0.47  | 5294  | 2.4E-22  |
| 4318 | A>G | CI  | L | L | 4 | 0.35  | 3959  | 4.9E-11 | 0.43  | 3497  | 8.2E-13 | 1.39  | 1649  | 6.8E-21  | 1.52  | 1637  | 4.0E-24  |
| 4489 | T>C | CI  | V | V | 4 | 8.22  | 6567  | 0.0E+00 | 8.52  | 6510  | 0.0E+00 | 8.87  | 11157 | 0.0E+00  | 9.10  | 10974 | 0.0E+00  |
| 4501 | A>G | CI  | T | T | 5 | 6.77  | 11506 | 0.0E+00 | 7.01  | 11915 | 0.0E+00 | 8.19  | 10242 | 0.0E+00  | 8.06  | 10116 | 0.0E+00  |
| 4597 | G>A | CI  | L | L | 4 | 0.34  | 14254 | 2.0E-30 | 0.33  | 14543 | 1.0E-32 | -     | -     | -        | -     | -     | -        |
| 4685 | G>A | CI  | V | I | 3 | 0.43  | 3460  | 1.4E-12 | 0.43  | 3288  | 4.0E-13 | -     | -     | -        | -     | -     | -        |
| 4777 | T>C | CI  | I | I | 4 | 1.09  | 5738  | 1.1E-51 | 0.74  | 5677  | 2.2E-40 | 0.67  | 9519  | 4.6E-65  | 0.49  | 9989  | 8.5E-41  |
| 5134 | C>T | CI  | F | F | 6 | 6.59  | 4601  | 0.0E+00 | 6.66  | 4564  | 0.0E+00 | 3.96  | 1336  | 5.2E-76  | 3.98  | 1280  | 1.3E-70  |
| 5434 | A>T | CI  | A | A | 4 | 25.68 | 4502  | 0.0E+00 | 25.89 | 4024  | 0.0E+00 | 47.92 | 4118  | 0.0E+00  | 49.35 | 4219  | 0.0E+00  |
| 5479 | A>G | CI  | E | E | 5 | 0.66  | 9649  | 5.5E-61 | 0.75  | 9639  | 8.7E-69 | 0.95  | 5785  | 2.0E-59  | 1.22  | 5755  | 5.1E-79  |
| 5542 | G>A | CI  | Q | Q | 5 | 0.18  | 13088 | 1.1E-11 | 0.17  | 13471 | 3.1E-11 | -     | -     | -        | -     | -     | -        |
| 5619 | T>C | 6K2 | V | A | 0 | 35.63 | 8148  | 0.0E+00 | 36.64 | 8115  | 0.0E+00 | 46.75 | 5025  | 0.0E+00  | 45.85 | 4853  | 0.0E+00  |

|      |     |     |   |   |    |       |       |          |       |       |          |       |       |          |       |       |          |
|------|-----|-----|---|---|----|-------|-------|----------|-------|-------|----------|-------|-------|----------|-------|-------|----------|
| 5659 | A>G | 6K2 | G | G | 6  | -     | -     | -        | -     | -     | -        | 0.25  | 12550 | 1.4E-16  | 0.31  | 12113 | 6.0E-23  |
| 5908 | A>G | VPg | G | G | 6  | 0.74  | 7674  | 2.4E-51  | 0.56  | 7529  | 1.0E-37  | -     | -     | -        | -     | -     | -        |
| 6001 | C>T | VPg | I | I | 4  | 0.37  | 7550  | 1.6E-16  | 0.63  | 7405  | 3.3E-37  | -     | -     | -        | -     | -     | -        |
| 6046 | T>C | VPg | D | D | 6  | 0.29  | 7709  | 1.4E-16  | 0.36  | 8018  | 4.6E-21  | 0.50  | 12298 | 5.6E-45  | 0.59  | 12092 | 7.8E-51  |
| 6326 | A>G | NIa | T | A | 0  | 0.37  | 11923 | 4.0E-22  | 0.43  | 11352 | 2.0E-29  | -     | -     | -        | -     | -     | -        |
| 6351 | T>C | NIa | V | A | 0  | 1.25  | 21798 | 3.3E-264 | 1.37  | 22737 | 2.5E-301 | 0.82  | 13716 | 3.6E-107 | 0.77  | 14248 | 2.8E-104 |
| 6367 | T>G | NIa | S | S | 4  | 0.77  | 14339 | 7.5E-89  | 0.80  | 14685 | 4.1E-85  | 0.67  | 16169 | 4.8E-95  | 0.64  | 16322 | 1.6E-93  |
| 6484 | G>A | NIa | L | L | 4  | 39.80 | 6576  | 0.0E+00  | 40.82 | 6319  | 0.0E+00  | 32.24 | 5307  | 0.0E+00  | 34.08 | 5404  | 0.0E+00  |
| 6703 | C>T | NIa | H | H | 8  | 41.88 | 4581  | 0.0E+00  | 43.10 | 4379  | 0.0E+00  | 25.10 | 12630 | 0.0E+00  | 25.92 | 13178 | 0.0E+00  |
| 6733 | A>G | NIa | G | G | 6  | 0.31  | 9265  | 1.2E-20  | 0.34  | 9355  | 7.7E-19  | 0.13  | 14982 | 5.8E-10  | 0.15  | 15030 | 6.7E-12  |
| 6760 | G>A | NIa | G | G | 6  | 0.54  | 2985  | 2.0E-10  | 0.87  | 2528  | 7.3E-17  | -     | -     | -        | -     | -     | -        |
| 6767 | G>A | NIa | V | I | 3  | -     | -     | -        | -     | -     | -        | 0.56  | 5763  | 9.1E-32  | 0.62  | 5467  | 9.7E-31  |
| 6840 | G>A | NIa | S | N | 1  | 32.06 | 8451  | 0.0E+00  | 32.00 | 8462  | 0.0E+00  | 23.66 | 7779  | 0.0E+00  | 25.17 | 8291  | 0.0E+00  |
| 6862 | G>A | NIa | E | E | 5  | 0.33  | 12950 | 4.3E-24  | 0.18  | 12982 | 1.1E-09  | 0.89  | 11762 | 2.5E-99  | 0.89  | 12116 | 2.0E-98  |
| 6931 | G>A | NIa | K | K | 5  | -     | -     | -        | -     | -     | -        | 0.40  | 6766  | 1.2E-15  | 0.36  | 6421  | 1.7E-12  |
| 7052 | T>C | NIb | L | L | 4  | 0.31  | 5876  | 1.2E-06  | 0.44  | 5618  | 1.6E-12  | -     | -     | -        | -     | -     | -        |
| 7089 | C>T | NIb | T | I | -1 | 0.63  | 10795 | 2.7E-60  | 0.61  | 10560 | 2.1E-56  | 0.85  | 11429 | 4.7E-97  | 0.80  | 10910 | 4.8E-87  |
| 7143 | A>G | NIb | D | G | -1 | 0.36  | 13205 | 2.3E-18  | 0.33  | 12886 | 6.0E-13  | -     | -     | -        | -     | -     | -        |
| 7206 | G>A | NIb | R | K | 2  | 1.22  | 1381  | 2.2E-11  | 1.06  | 1216  | 2.9E-09  | 0.83  | 3730  | 1.5E-18  | 0.70  | 3707  | 5.9E-13  |
| 7255 | T>C | NIb | V | V | 4  | 1.16  | 11281 | 4.5E-145 | 1.09  | 11560 | 9.1E-133 | 1.86  | 16615 | 0.0E+00  | 1.67  | 16419 | 0.0E+00  |
| 7348 | C>T | NIb | T | T | 5  | 0.51  | 8994  | 2.7E-35  | 0.40  | 8828  | 3.8E-24  | 2.18  | 2479  | 1.9E-68  | 1.41  | 2409  | 3.0E-43  |
| 7353 | A>G | NIb | E | G | -2 | 0.47  | 7678  | 6.8E-29  | 0.38  | 7273  | 4.2E-22  | 2.22  | 2569  | 9.4E-76  | 2.09  | 2536  | 3.3E-68  |
| 7452 | A>G | NIb | K | R | 2  | -     | -     | -        | -     | -     | -        | 0.51  | 7453  | 1.0E-32  | 0.62  | 7596  | 1.5E-45  |
| 7456 | G>A | NIb | E | E | 5  | 1.73  | 3515  | 7.0E-54  | 2.14  | 3407  | 1.6E-76  | 2.17  | 7413  | 1.2E-204 | 2.46  | 7507  | 1.8E-225 |
| 7558 | A>G | NIb | A | A | 4  | 16.39 | 2291  | 0.0E+00  | 17.48 | 2145  | 0.0E+00  | 10.62 | 5704  | 0.0E+00  | 11.61 | 5694  | 0.0E+00  |
| 7640 | T>C | NIb | F | L | 0  | 1.70  | 6617  | 2.9E-119 | 1.48  | 6474  | 1.4E-86  | -     | -     | -        | -     | -     | -        |
| 7657 | T>C | NIb | I | I | 4  | 0.28  | 11016 | 6.7E-20  | 0.38  | 10843 | 4.2E-30  | -     | -     | -        | -     | -     | -        |
| 7721 | C>T | NIb | L | L | 4  | -     | -     | -        | -     | -     | -        | 0.37  | 13765 | 8.0E-43  | 0.36  | 13892 | 4.0E-40  |
| 7894 | A>G | NIb | S | S | 4  | 2.01  | 5870  | 2.7E-140 | 2.42  | 5488  | 1.8E-154 | 1.74  | 4369  | 9.2E-93  | 1.92  | 4427  | 1.4E-101 |
| 7933 | T>C | NIb | N | N | 6  | 1.97  | 1967  | 1.6E-41  | 1.91  | 1831  | 1.5E-41  | 1.23  | 2115  | 5.5E-26  | 0.80  | 2134  | 6.5E-17  |

|      |     |      |    |    |    |      |       |          |      |       |          |       |       |          |       |       |          |
|------|-----|------|----|----|----|------|-------|----------|------|-------|----------|-------|-------|----------|-------|-------|----------|
| 7954 | C>T | NIB  | T  | T  | 5  | 9.90 | 7771  | 0.0E+00  | 8.88 | 7637  | 0.0E+00  | 29.59 | 4420  | 0.0E+00  | 28.95 | 4391  | 0.0E+00  |
| 8031 | T>C | NIB  | I  | T  | -1 | 0.15 | 19697 | 8.4E-14  | 0.14 | 19844 | 1.8E-11  | -     | -     | -        | -     | -     | -        |
| 8083 | G>A | NIB  | V  | V  | 4  | 0.32 | 10334 | 3.7E-21  | 0.28 | 10242 | 1.1E-16  | -     | -     | -        | -     | -     | -        |
| 8101 | T>A | NIB  | S  | R  | -1 | 9.44 | 6285  | 0.0E+00  | 9.19 | 5888  | 0.0E+00  | 14.46 | 15004 | 0.0E+00  | 14.98 | 14845 | 0.0E+00  |
| 8128 | C>T | NIB  | F  | F  | 6  | 2.33 | 9062  | 2.5E-221 | 2.64 | 9110  | 2.6E-258 | 0.70  | 7597  | 2.3E-43  | 0.61  | 7998  | 2.7E-42  |
| 8135 | C>G | NIB  | L  | V  | 1  | 1.89 | 21253 | 0.0E+00  | 1.79 | 21664 | 0.0E+00  | -     | -     | -        | -     | -     | -        |
| 8458 | G>A | NIB  | K  | K  | 5  | -    | -     | -        | -    | -     | -        | 0.19  | 12052 | 1.5E-13  | 0.25  | 11526 | 1.0E-19  |
| 8474 | A>G | NIB  | T  | A  | 0  | 1.02 | 12929 | 4.4E-79  | 1.04 | 13639 | 3.1E-79  | 1.13  | 10121 | 4.0E-117 | 1.41  | 10053 | 3.0E-166 |
| 8477 | G>A | NIB  | V  | I  | 3  | 0.22 | 9695  | 5.4E-15  | 0.19 | 10263 | 7.7E-10  | 0.33  | 10862 | 3.9E-23  | 0.39  | 10871 | 6.7E-31  |
| 8610 | C>T | CP   | A  | V  | 0  | 1.57 | 6869  | 2.4E-133 | 1.53 | 7302  | 2.1E-138 | 0.36  | 9120  | 5.5E-26  | 0.50  | 9519  | 2.9E-41  |
| 8630 | A>G | CP   | I  | V  | 3  | -    | -     | -        | -    | -     | -        | 0.29  | 4198  | 7.2E-08  | 0.48  | 4370  | 1.2E-16  |
| 8635 | A>G | CP   | Q  | Q  | 5  | 0.26 | 5680  | 2.3E-11  | 0.27 | 5609  | 8.2E-07  | 0.51  | 4322  | 8.7E-21  | 0.50  | 4613  | 3.7E-22  |
| 8644 | C>T | CP   | L  | L  | 4  | -    | -     | -        | -    | -     | -        | 0.25  | 7166  | 2.7E-07  | 0.29  | 7593  | 1.8E-08  |
| 8690 | C>T | CP   | H  | Y  | 2  | 0.09 | 25849 | 1.3E-08  | 0.08 | 26032 | 1.1E-06  | -     | -     | -        | -     | -     | -        |
| 8716 | C>T | CP   | I  | I  | 4  | 5.28 | 10694 | 0.0E+00  | 5.23 | 10783 | 0.0E+00  | 4.85  | 6688  | 0.0E+00  | 4.88  | 6289  | 0.0E+00  |
| 8987 | G>A | CP   | V  | I  | 3  | 1.36 | 10286 | 2.9E-155 | 1.36 | 10487 | 6.7E-165 | 0.99  | 12482 | 9.7E-137 | 1.29  | 12274 | 1.9E-183 |
| 8989 | C>T | CP   | V  | V  | 4  | -    | -     | -        | -    | -     | -        | 0.23  | 14791 | 4.5E-21  | 0.14  | 14728 | 3.9E-09  |
| 9008 | A>G | CP   | I  | V  | 3  | 1.30 | 13274 | 2.1E-196 | 1.38 | 13371 | 1.4E-215 | 0.71  | 14407 | 1.6E-104 | 0.67  | 14642 | 3.9E-98  |
| 9100 | A>G | CP   | E  | E  | 5  | 0.26 | 5763  | 1.9E-11  | 0.43 | 5634  | 2.2E-20  | 0.51  | 4290  | 5.7E-21  | 0.38  | 4173  | 8.7E-15  |
| 9202 | G>A | CP   | R  | R  | 5  | 0.89 | 5587  | 4.4E-53  | 0.62 | 5819  | 2.7E-36  | -     | -     | -        | -     | -     | -        |
| 9377 | G>A | 3UTR | NA | NA | NA | 0.61 | 19488 | 9.4E-105 | 0.53 | 20273 | 2.4E-89  | 0.38  | 50405 | 7.1E-136 | 0.41  | 47974 | 1.5E-147 |
| 9405 | C>T | 3UTR | NA | NA | NA | 2.01 | 1339  | 1.6E-30  | 1.42 | 1261  | 5.1E-20  | 1.09  | 12741 | 3.9E-168 | 0.90  | 12381 | 7.5E-126 |
| 9474 | C>T | 3UTR | NA | NA | NA | 1.32 | 1132  | 3.5E-17  | 2.21 | 991   | 6.8E-27  | 3.81  | 2203  | 1.9E-79  | 3.64  | 2092  | 4.5E-74  |
| 9508 | T>C | 3UTR | NA | NA | NA | -    | -     | -        | -    | -     | -        | 0.11  | 43717 | 4.4E-18  | 0.11  | 43513 | 1.2E-21  |
| 9524 | T>G | 3UTR | NA | NA | NA | 1.75 | 6736  | 1.0E-111 | 1.87 | 6780  | 1.3E-125 | 2.00  | 29056 | 0.0E+00  | 2.06  | 30192 | 0.0E+00  |
| 9541 | A>G | 3UTR | NA | NA | NA | 0.37 | 4281  | 1.3E-14  | 0.32 | 4367  | 5.6E-12  | -     | -     | -        | -     | -     | -        |
| 9613 | C>T | 3UTR | NA | NA | NA | -    | -     | -        | -    | -     | -        | 0.10  | 25245 | 1.2E-08  | 0.12  | 24123 | 2.2E-13  |
